# Supplementary material for: Multicomponent, nonpharmacological delirium interventions for older inpatients
Source: Springer Nature journal article supplement (doi:10.1007/s00391-019-01627-y), 2019-10-18
Supplement: MOESM1 [file 17288844]

## Search strategies and search terms used in Medline (via PubMed) \*

| Delirium                                                                                                                                                                                                                                                                                                                                                                                                                                                                                                                                                                                                                                                                                                                                                                                                                                                                                                                                                                                                                                                                                                            | Delirium                                                                                                                                                                                                                                                                                                                                                                                                                                                                                                                                                                                                                                                                                                                                                                                                                                                                                                                                                                                                                                                                                                                                                            | Delirium                                                                                                                                                                                                                                                                                                                                                                                                                                                                                                                                                                                                                                                                                                                                                                                                                                                                                                                                                                                                                                                                                                                                                                                                                                                                                                           |
|---------------------------------------------------------------------------------------------------------------------------------------------------------------------------------------------------------------------------------------------------------------------------------------------------------------------------------------------------------------------------------------------------------------------------------------------------------------------------------------------------------------------------------------------------------------------------------------------------------------------------------------------------------------------------------------------------------------------------------------------------------------------------------------------------------------------------------------------------------------------------------------------------------------------------------------------------------------------------------------------------------------------------------------------------------------------------------------------------------------------|---------------------------------------------------------------------------------------------------------------------------------------------------------------------------------------------------------------------------------------------------------------------------------------------------------------------------------------------------------------------------------------------------------------------------------------------------------------------------------------------------------------------------------------------------------------------------------------------------------------------------------------------------------------------------------------------------------------------------------------------------------------------------------------------------------------------------------------------------------------------------------------------------------------------------------------------------------------------------------------------------------------------------------------------------------------------------------------------------------------------------------------------------------------------|--------------------------------------------------------------------------------------------------------------------------------------------------------------------------------------------------------------------------------------------------------------------------------------------------------------------------------------------------------------------------------------------------------------------------------------------------------------------------------------------------------------------------------------------------------------------------------------------------------------------------------------------------------------------------------------------------------------------------------------------------------------------------------------------------------------------------------------------------------------------------------------------------------------------------------------------------------------------------------------------------------------------------------------------------------------------------------------------------------------------------------------------------------------------------------------------------------------------------------------------------------------------------------------------------------------------|
| <p>+ Old age<br/>+ Hospital<br/>+ With intervention<br/>- Without dementia/<br/>cognitive impairment</p> <pre>( Delirium[Mesh] OR Deliri*[tiab] OR acute confusion*[tiab] OR "metabolic encephalopathy"[tiab] OR "clouding of consciousness"[tiab] ) AND ( ("cognition disorders"[mh] OR cognitive impair*[tiab] OR cognitive dysfunction*[tiab] OR cognitive disorder*[tiab] OR neurocognitive disorder*[tiab] OR cognitive decline[tiab]) OR (dementia[mh] OR dementia[tiab] OR alzheimer*[tiab] OR "Lewy Body"[tiab]) ) AND ( aged[mh] OR ageing[tiab] OR elder*[tiab] OR older[tiab] OR old age*[tiab] OR "old people"[tiab] OR senior*[tiab] ) AND ( "Hospitals"[Mesh] OR "Hospitalization"[Mesh] OR ward*[tiab] OR unit*[tiab] OR clinic[tiab] OR clinics[tiab] OR clinical[tiab] OR hospital*[tiab] ) NOT ( "Intensive Care Units"[Mesh] OR "Residential Facilities"[Mesh] OR "Hospices"[Mesh] OR "Cancer Care Facilities"[Mesh] OR "Hospitals, Maternity"[Mesh] OR "Hospitals, Pediatric"[Mesh] OR "Hospitals, Psychiatric"[Mesh] ) AND (german[la] OR english[la]) NOT (animals[mh] NOT humans[mh]) </pre> | <p>+ Old age<br/>+ Hospital<br/>- Without intervention<br/>+ Without dementia/<br/>cognitive impairment</p> <pre>( Delirium[Mesh] OR Deliri*[tiab] OR acute confusion*[tiab] OR "metabolic encephalopathy"[tiab] OR "clouding of consciousness"[tiab] ) AND ( aged[mh] OR ageing[tiab] OR elder*[tiab] OR older[tiab] OR old age*[tiab] OR "old people"[tiab] OR senior*[tiab] ) AND ( treatment[tiab] OR intervention[tiab] OR strateg*[tiab] OR concept*[tiab] OR "Tertiary Prevention"[Mesh] OR "Secondary Prevention"[Mesh] OR "Primary Prevention"[Mesh] OR prevent*[tiab] OR "prevention and control" [sh] OR manag*[tiab] OR Path[tiab] OR Paths[tiab] OR pathway*[tiab] OR Program*[tiab] ) AND ( "Hospitals"[Mesh] OR "Hospitalization"[Mesh] OR ward*[tiab] OR unit*[tiab] OR clinic[tiab] OR clinics[tiab] OR clinical[tiab] OR hospital*[tiab] ) NOT ( "Intensive Care Units"[Mesh] OR "Residential Facilities"[Mesh] OR "Hospices"[Mesh] OR "Cancer Care Facilities"[Mesh] OR "Hospitals, Maternity"[Mesh] OR "Hospitals, Pediatric"[Mesh] OR "Hospitals, Psychiatric"[Mesh] ) AND (german[la] OR english[la]) NOT (animals[mh] NOT humans[mh]) </pre> | <p>- Without old age<br/>+ Hospital<br/>+ With intervention<br/>+ With dementia/<br/>cognitive impairment</p> <pre>( Delirium[Mesh] OR Deliri*[tiab] OR acute confusion*[tiab] OR "metabolic encephalopathy"[tiab] OR "clouding of consciousness"[tiab] ) AND ( ("cognition disorders"[mh] OR cognitive impair*[tiab] OR cognitive dysfunction*[tiab] OR cognitive disorder*[tiab] OR neurocognitive disorder*[tiab] OR cognitive decline[tiab]) OR (dementia[mh] OR dementia[tiab] OR alzheimer*[tiab] OR "Lewy Body"[tiab]) ) AND ( treatment[tiab] OR intervention[tiab] OR strateg*[tiab] OR concept*[tiab] OR "Tertiary Prevention"[Mesh] OR "Secondary Prevention"[Mesh] OR "Primary Prevention"[Mesh] OR prevent*[tiab] OR "prevention and control" [sh] OR manag*[tiab] OR Path[tiab] OR Paths[tiab] OR pathway*[tiab] OR Program*[tiab] ) AND ( "Hospitals"[Mesh] OR "Hospitalization"[Mesh] OR ward*[tiab] OR unit*[tiab] OR clinic[tiab] OR clinics[tiab] OR clinical[tiab] OR hospital*[tiab] ) NOT ( "Intensive Care Units"[Mesh] OR "Residential Facilities"[Mesh] OR "Hospices"[Mesh] OR "Cancer Care Facilities"[Mesh] OR "Hospitals, Maternity"[Mesh] OR "Hospitals, Pediatric"[Mesh] OR "Hospitals, Psychiatric"[Mesh] ) AND (german[la] OR english[la]) NOT (animals[mh] NOT humans[mh]) </pre> |
| <p>* The search strategies and search terms used in the other databases Cinahl, Cochrane-Library, PsychInfo and Web of Science can be requested from the authors (e-mail: eckstein@nar.uni-heidelberg.de, heinrich.burkhardt@umm.de).</p>                                                                                                                                                                                                                                                                                                                                                                                                                                                                                                                                                                                                                                                                                                                                                                                                                                                                           |                                                                                                                                                                                                                                                                                                                                                                                                                                                                                                                                                                                                                                                                                                                                                                                                                                                                                                                                                                                                                                                                                                                                                                     |                                                                                                                                                                                                                                                                                                                                                                                                                                                                                                                                                                                                                                                                                                                                                                                                                                                                                                                                                                                                                                                                                                                                                                                                                                                                                                                    |
