# Supplementary material for: Multicomponent, nonpharmacological delirium interventions for older inpatients
Source: Springer Nature journal article supplement (doi:10.1007/s00391-019-01627-y), 2019-10-18
Supplement: MOESM2 [file 17290766]

## Reasons for study exclusion

| Exclusion category                                                                                                                                                                                                                                                                                              | Study                                                                                                                                                                                                                                                                                                                                                                                                                     | Quantity  |
|-----------------------------------------------------------------------------------------------------------------------------------------------------------------------------------------------------------------------------------------------------------------------------------------------------------------|---------------------------------------------------------------------------------------------------------------------------------------------------------------------------------------------------------------------------------------------------------------------------------------------------------------------------------------------------------------------------------------------------------------------------|-----------|
| <b>Study requested, but not available</b>                                                                                                                                                                                                                                                                       | (1) Fick et al. 2015                                                                                                                                                                                                                                                                                                                                                                                                      | 1         |
| <b>Single intervention</b>                                                                                                                                                                                                                                                                                      | (2) Goldberg et al. 2014                                                                                                                                                                                                                                                                                                                                                                                                  | 1         |
| <b>Exclusively education programm/measurement</b>                                                                                                                                                                                                                                                               | (3) Cooley et al. 2016<br>(4) Palmer et al. 2014<br>(5) Pizzacalla et al. 2015<br>(6) Tabet et al. 2005<br>(7) Van der Steeg et al. 2014<br>(8) Wilkerson et al. 2014<br>(9) Yevchak et al. 2012                                                                                                                                                                                                                          | 7         |
| <b>Language</b><br>(Englisch/German not available)                                                                                                                                                                                                                                                              | (10) Bonaventura et al. 2007 (Italian language)<br>(11) Chi et al. 2015 (Chinese language)<br>(12) Hwang et al. 2015 (Korean language)<br>(13) Navarrete et al. 2016 (Spanish language)                                                                                                                                                                                                                                   | 4         |
| <b>Exclusively volunteer-based approaches</b>                                                                                                                                                                                                                                                                   | (14) Caplan et al. 2007<br>(15) Gorski et al. 2017<br>(16) Sandhaus et al. 2010<br>(17) Steunenberget al. 2016                                                                                                                                                                                                                                                                                                            | 4         |
| <b>Exclusively family-based approaches</b>                                                                                                                                                                                                                                                                      | (18) Martinez et al. 2012<br>(19) Paulen et al. 2016<br>(20) Rosenbloom-Brunton et al. 2010                                                                                                                                                                                                                                                                                                                               | 3         |
| <b>Not delirium-specific</b>                                                                                                                                                                                                                                                                                    | (21) Rubin et al. 2006<br>(22) Stenvall et al. 2012                                                                                                                                                                                                                                                                                                                                                                       | 2         |
| <b>Inappropriate to research question</b>                                                                                                                                                                                                                                                                       | (23) Borgardus et al. 2003 (long-term-effects)<br>(24) Pretto et al. 2009 (workload nurses)<br>(25) Van Velthuisen et al. 2017<br>(Retrospective data collection of provided interventions, not based on a program)<br>(26) Yevchak et al. 2017 (qualitatively derived themes)                                                                                                                                            | 4         |
| <b>Repeated data use of original study</b>                                                                                                                                                                                                                                                                      | (27) Pitkälä et al. 2008                                                                                                                                                                                                                                                                                                                                                                                                  | 1         |
| <b>External expert team</b><br>Intervention approaches that were not provided by health care professionals of a ward team:<br>consultation, liaison, co-treatment, cross-department cooperation, cross-sectoral cooperation provided by external experts (with or without the combination of voluntary support) | (28) Angel et al. 2016<br>(29) Bakker et al. 2014<br>(30) Baldwin et al. 2004<br>(31) Björkelund et al. 2010<br>(32) Booth et al. 2019<br>(33) Cole et al. 1994<br>(34) Cole et al. 2002<br>(35) Deschodt et al. 2012<br>(36) Inouye et al. 1999<br>(37) Inouye et al. 2000<br>(38) Marcantonio et al. 2001<br>(39) Mouchoux et al. 2011<br>(40) Naughton et al. 2005<br>(41) Yoo et al. 2014<br>(42) Zaubler et al. 2013 | 15        |
| <b>Specialized geriatrician wards/areas</b><br>with unique architecture or surroundings, special fittings, e.g. "delirium room"                                                                                                                                                                                 | (43) Chong et al. 2014<br>(44) Goldberg et al. 2013<br>(45) Mudge et al. 2012                                                                                                                                                                                                                                                                                                                                             | 3         |
| <b>Other specialized wards/areas</b><br>(Day clinics, rehabilitation facilities, psychiatric hospital, long-term care, home care, oncology, palliative care, hospice, emergency, intensive care, maternity/child care)                                                                                          | (46) Balas et al. 2014<br>(47) Bergmann et al. 2005<br>(48) Ferguson et al. 2018 (mixed Setting)<br>(49) Kolanowski et al. 2016Ka                                                                                                                                                                                                                                                                                         | 4         |
| <b>No original studies</b><br>(study report/surveys/summeries)                                                                                                                                                                                                                                                  | (50) Hasemann et al. 2010<br>(51) Hasemann et al. 2013<br>(52) Menzies et al. 2012<br>(53) Inouye et al. 1993<br>(54) Inouye et al. 2004                                                                                                                                                                                                                                                                                  | 5         |
| <b>Different target groups</b><br>(e.g. people with cancer)                                                                                                                                                                                                                                                     | (55) Chen et al. 2011<br>(56) Chen et al. 2017                                                                                                                                                                                                                                                                                                                                                                            | 2         |
| <b>Summary</b>                                                                                                                                                                                                                                                                                                  |                                                                                                                                                                                                                                                                                                                                                                                                                           | <b>56</b> |
