# Supplementary material for: Multicomponent, nonpharmacological delirium interventions for older inpatients
Source: Springer Nature journal article supplement (doi:10.1007/s00391-019-01627-y), 2019-10-18
Supplement: MOESM3 [file 17290766]

Claudia Eckstein<sup>1</sup>, Heinrich Burkhardt<sup>2</sup><sup>1</sup> Network Ageing Research, University of Heidelberg, Germany.<sup>2</sup> Department of Geriatric Medicine, University Medicine Mannheim, Germany.

## Overview of included studies

| No. | Study                           | Country     | Objectives                                                                                                                                       | Design                                                  | Setting <sup>(1)</sup>                  | Patient-sample <sup>(1)</sup>                                                                                                                                     | Duration                                            | In-/exclusion criteria                                                                                                                                    | Inclusion of PwD <sup>(2)</sup> /MCI <sup>(3)</sup> ? | Performed in geriatric ward? |
|-----|---------------------------------|-------------|--------------------------------------------------------------------------------------------------------------------------------------------------|---------------------------------------------------------|-----------------------------------------|-------------------------------------------------------------------------------------------------------------------------------------------------------------------|-----------------------------------------------------|-----------------------------------------------------------------------------------------------------------------------------------------------------------|-------------------------------------------------------|------------------------------|
| 1   | Allen et al. (2011)             | USA         | Early detection/treatment/ prevention of delirium                                                                                                | Pre- and post-test design                               | Acute-care for elders                   | Geriatric population; age 65 and over; pre-phase: n=102; post-phase: n=97                                                                                         | Not stated                                          | Not stated                                                                                                                                                | (X)                                                   | X                            |
| 2   | Andro et al. (2012)             | France      | Evaluation of demented hospitalized patients                                                                                                     | Pre- and post-test design                               | Acute-care geriatric                    | Geriatric population; age 75 and over; pre-phase: n=367; post-phase: n=372                                                                                        | 07/2008-12/2009; 18 months                          | Inclusion: several forms of dementia                                                                                                                      | X                                                     | X                            |
| 3   | Avendaño-Céspedes et al. (2016) | Spain       | Analysis of nurse-led interventions (patient outcomes: incidence/duration/severity of delirium, and feasibility)                                 | RCT <sup>(4)</sup> (power-calculation conducted)        | Acute-geriatric ward                    | Geriatric population; age 65 and over; IG <sup>(5)</sup> : n=321; CG <sup>(6)</sup> : n=29                                                                        | 10/2013-02/2014; 5 months                           | Exclusion: severe cognitive decline                                                                                                                       | (x)                                                   | X                            |
| 4   | Benedict et al. (2009)          | USA         | Investigation of the effectiveness of delirium prevention protocols, based on modified NEECHAM (Neelon et al. 1996) tool                         | Prospective observational study                         | Acute-care of elders' unit              | Population; age 60 and over; IG <sup>(5)</sup> : n=70 (mean age: 78,9 years); CG <sup>(6)</sup> : n=35 (mean age: 78,1 years)                                     | 01/2006-04-2006; 4 months                           | Exclusion: delirium, long-term care, drugs                                                                                                                | (X)                                                   | X                            |
| 5   | Bo et al. (2009)                | Italy       | Investigation of acute-geriatric ward, compared with acute-general medical ward: which ward is associated with reduced delirium incidence        | Prospective observational study                         | Acute-geriatric ward/acute-medical ward | Geriatric population; age 70 and over; IG <sup>(5)</sup> : n=121; CG <sup>(6)</sup> : n=131                                                                       | 01/2007-04/2007; 4 months                           | Exclusion: delirium, psychiatric and neurologic disorders, language, alcohol                                                                              |                                                       | X                            |
| 6   | Foster et al. (2010)            | Australia   | To implement a best practice approach to assess, to manage and to prevent delirium                                                               | Qualitative: action research                            | 2 acute-medical wards                   | "High-risk" population; age 65 and over (history of fall, 3 medications or 1 opiate, memory loss or confusion, visual/hearing impairment, severe illness (n=30))  | 2008; 6 months                                      | Exclusion: patients without risk profile                                                                                                                  |                                                       |                              |
| 7   | Godfrey et al. (2013)           | UK          | Development of a novel delirium, focused in the implementation process                                                                           | Qualitative: participatory action research              | 3 hospitals, elderly care               | Population: elderly, not specified                                                                                                                                | Not described in detail; 14 months                  |                                                                                                                                                           |                                                       | X                            |
| 8   | Hasemann et al. (2016)          | Switzerland | Determination of the effects of DemDel, a comprehensive delirium management program for older inpatients in acute-care with cognitive impairment | Pre- and post-test design (power-calculation conducted) | 4 general medical wards                 | Population; age over 70 years and older; IG <sup>(5)</sup> : n=138; CG <sup>(6)</sup> : n=130                                                                     | 01/2009-08/2009; 01/2010-08/2010; 2 x 8 months      | Exclusion: language, blind/deaf patients, terminal/neurological illness, coma, drugs, alcohol; inclusion: all patients with signs of cognitive impairment | X                                                     |                              |
| 9   | Holroyd-Leduc et al. (2010)     | Canada      | Implementation/evaluation of an evidence-based electronic care pathway, which incorporates multicomponent delirium strategies                    | Interrupted design (prospective cohort study)           | 2 orthopaedic units                     | Population: age over 65 years and older with hip fractures; IG <sup>(5)</sup> : n=170; CG <sup>(6)</sup> : n=173                                                  | 10/2008-08/2009; 11 months                          | Exclusion: non-native speakers, fractures caused by motor vehicle crashes                                                                                 |                                                       |                              |
| 10  | Holt et al. (2013)              | UK          | Examination of the effect of a multicomponent, delirium prevention intervention                                                                  | Pre- and post-test design                               | 3 care wards (specialized for elderly)  | Population: "elderly" without limitation IG <sup>(5)</sup> : n=187 (mean age: 85,8 years, SD: ±5.39); CG <sup>(6)</sup> : n=249 (mean age: 85,01 years, SD: 6.03) | 10/2007-03/2008; 6 months 08/2008-01/2009; 6 months | Exclusion: delirium; language; inclusion: admitted as emergency                                                                                           | (X)                                                   | X                            |
| 11  | Jeffs et al. (2013)             | Australia   | Comparison between an intervention program (with exercise, mobilisation, and orientation) and usual care to prevent delirium                     | RCT <sup>(4)</sup> (power-calculation conducted)        | 2 acute-medical wards                   | Population: age over 65 years or older; IG <sup>(5)</sup> : n=305; CG <sup>(6)</sup> : n=344                                                                      | 05/2005-12/2007; 32 months                          | Exclusion: severe dysphasia, communication impossible, death expected within 24 h, isolation, contraindication mobilisation, stroke/ICU                   |                                                       |                              |
| 12  | Kratz et al. (2015)             | Germany     | Investigation of a prospective intervention with psycho-geriatric liaison* on surgical wards                                                     | Non-randomized, combined with pre- and post-test design | 2 general surgical wards                | Population: age over 70 years and older; prevalence phase: n= 125; intervention phase: IG <sup>(5)</sup> : n=61; CG <sup>(6)</sup> : n=53                         | 03/2011-06/2012; 16 months                          | Exclusion: advanced dementia, severe delirium pre-operatively; end stage                                                                                  |                                                       |                              |

\*The responsible "delirium nurse" was referred as a "liaison nurse". However, the preventive interventions were not performed as part of a liaison service. Rather, the "delirium nurse" was a member of the ward team.

Claudia Eckstein<sup>1</sup>, Heinrich Burkhardt<sup>2</sup>

<sup>1</sup> Network Ageing Research, University of Heidelberg, Germany.

<sup>2</sup> Department of Geriatric Medicine, University Medicine Mannheim, Germany.

| No. | Study                   | Country   | Objectives                                                                                                                                                                                             | Design                                                  | Setting <sup>(1)</sup>                                | Patient-sample <sup>(1)</sup>                                                                                                                                                                                                                     | Duration                                          | In-/exclusion criteria                                                                                                                                                                    | Inclusion of PwD <sup>(2)</sup> / MCI <sup>(3)</sup> ? | Performed in geriatric ward? |
|-----|-------------------------|-----------|--------------------------------------------------------------------------------------------------------------------------------------------------------------------------------------------------------|---------------------------------------------------------|-------------------------------------------------------|---------------------------------------------------------------------------------------------------------------------------------------------------------------------------------------------------------------------------------------------------|---------------------------------------------------|-------------------------------------------------------------------------------------------------------------------------------------------------------------------------------------------|--------------------------------------------------------|------------------------------|
| 13  | Kurrle et al. (2019)    | Australia | Evaluation of a model of care (CHOPs: Confused Hospitalised Older Persons Program) to improve recognition, assessment and management of older patients with cognitive impairment                       | Pre- and post-test design                               | 6 hospitals (13 wards, 2 of those: aged care wards)   | Population: all patients over 65 years and older (Aboriginal patients over 45 years); randomly selected medical records; sample: n=743                                                                                                            | 12 months (period varied between 02/2014-10/2016) | Exclusion: emergency only admissions or day only patient admission                                                                                                                        | (X)                                                    | (X)                          |
| 14  | Lundström et al. (1999) | Sweden    | Investigation of a reorganized nursing program to reduce the incidence of post-operative delirium and to improve patient's functional outcomes                                                         | Prospective observational study (historical comparison) | 1 ortho-geriatric rehabilitation                      | Population: all patients (age range: 65-98, mean: 79.7 years, SD ±7.5) with femoral neck fractures; n=49                                                                                                                                          | 01/1993-12/1993; 12 months                        | Exclusion: patients without surgical treatment                                                                                                                                            | (X)                                                    | X                            |
| 15  | Lundström et al. (2005) | Sweden    | Investigation whether an education program and a reorganization of nursing/medical care would improve outcome for older delirious patients                                                             | Prospective observational study                         | 2 general internal medicine wards                     | Population: age over 70 years and older; IG <sup>(5)</sup> : n=200; CG <sup>(6)</sup> : n=200                                                                                                                                                     | 8 months (period of time not stated)              | Exclusion: younger than 70 years                                                                                                                                                          | (X)                                                    |                              |
| 16  | Lundström et al. (2007) | Sweden    | Examination whether a post-operative multifactorial intervention program can reduce delirium and improve patient's outcome                                                                             | RCT <sup>(4)</sup> (power-calculation conducted)        | 1 geriatric and 1 orthopaedic ward                    | Population: all patients over 70 years and older with femoral neck fractures; IG <sup>(5)</sup> : n=102; CG <sup>(6)</sup> : n=97                                                                                                                 | 05/2000-12/2002; 32 months                        | Exclusion: severe rheumatoid arthritis, severe hip osteoarthritis, severe renal failure, pathological fracture, bedridden before fracture                                                 | (X)                                                    | X                            |
| 17  | Mattison et al. (2014)  | USA       | Investigation whether a bundled intervention can increase detection of delirium and facilitate safer use of high-risk medications (multicomponent, pharma- and non-pharmacological intervention)       | Pre- and post-test design                               | Medical/ surgical center geriatric-focused acute-care | Population: all patients cohort I: aged 80 and over: pre-phase: n=5,077; post-phase: n=5,571; cohort II: aged 70 to 79: pre-phase: n=4,819; post-phase: n=4,482                                                                                   | 05/2008-09/2011; 41 months                        | Exclusion: other wards (ICU, oncology, psychiatry)                                                                                                                                        |                                                        | (X)                          |
| 18  | Milisen et al. (2001)   | Belgium   | Development and testing the effectiveness of a nurse-led interdisciplinary intervention program for delirium                                                                                           | Pre- and post-test design                               | 2 trauma-tological wards                              | Population: patients admitted to emergency department with a traumatic fracture of prox. femur who received surgery within 24 h; IG <sup>(5)</sup> : n=60 (median age: 82 years, IQR 13); CG <sup>(6)</sup> : n=60 (median age: 80 years, IQR 12) | 09/1996-03/1998; 19 months                        | Exclusion: multiple trauma, concussion of the brain, pathological fractures, surgery more than 72 h after admission, aphasia, blind-/deafness, and fewer than 9 years of formal education | (X)                                                    |                              |
| 19  | Miller et al. (2004)    | USA       | Testing of intervention that obtains personal information from caregivers on older adults' behaviours indicating discomfort                                                                            | Pre- and post-test design                               | 1 geriatric and 1 orthopaedic ward                    | Population: cohort I: age 64 and over (admitted from nursing home), cohort II: 74 years and older (admitted from a residence, foster care/ retirement community); IG <sup>(5)</sup> : n=43; CG <sup>(6)</sup> : n=38                              | 2 months (period of time not stated)              | Inclusion: diagnosis of chronic cognitive impairment/dementia, no diagnosis of cognitive impairment but mental problems noted at admission                                                | X                                                      | X                            |
| 20  | Pitkälä et al. (2006)   | Finland   | Investigation of the effectiveness in reducing mortality of a geriatric assessment/tailored treatment for patients with delirium                                                                       | RCT <sup>(4)</sup>                                      | 6 medical wards with geriatric care                   | Population: age over 69 years and older; IG <sup>(5)</sup> : n=87; CG <sup>(6)</sup> : n=87                                                                                                                                                       | 09/2001 - 11/2002; 16 months                      | Exclusion: life expectancy less than 6 months, admission from long-term care, discharged in 48 h; inclusion: delirium                                                                     | (X)                                                    | (X)                          |
| 21  | Robinson et al. (2008)  | USA       | Investigation of the effectiveness of a protocol designed to prevent older inpatients with risk factors from delirium                                                                                  | Pre- and post-test design                               | 1 renal unit                                          | Population: age over 69 years and older; pre-phase: n=80; post-phase: n=80                                                                                                                                                                        | 1 year (period of time not stated)                | Inclusion: patients with any combination (dementia, vision-hearing-mobility impairment)                                                                                                   | (X)                                                    |                              |
| 22  | Rudolph et al. (2014)   | USA       | Improvement project to identify and modify delirium risk and discharge to rehabilitation                                                                                                               | Propensity-matched cohort study                         | 2 acute-care medical wards                            | Population: veterans age over 65 years and older; IG <sup>(5)</sup> : n=566; CG <sup>(6)</sup> : n=566                                                                                                                                            | Not stated                                        | Exclusion: ICU, unable to communicate, in-patient for 48 h or longer before screening                                                                                                     | (X)                                                    |                              |
| 23  | Vidán et al. (2009)     | Spain     | Analysing the effectiveness of a multicomponent intervention, integrated into daily practice to prevent older inpatients of delirium                                                                   | Prospective cohort study                                | 1 geriatric & 2 internal wards                        | Population: age over 70 years and older; IG <sup>(5)</sup> : n=140; CG <sup>(6)</sup> : n=222                                                                                                                                                     | 01/2007-12/2007; 12 months                        | Exclusion: severe dementia, aphasia, coma, agonic status, expected stay shorter than 48 h                                                                                                 | (X)                                                    | X                            |
| 24  | Wand et al. (2014)      | Australia | Evaluation of the effectiveness of an educational program in preventing delirium in hospitalized older patients and improving staff practice                                                           | Pre- and post-test design                               | 1 general medical ward                                | Population: age over 65 years and older; pre-phase: n=126; post-phase: n=129                                                                                                                                                                      | 05/2011-09/2012; 17 months                        | Exclusion: non-verbal patients, terminal illness, and receiving comfort care                                                                                                              | (X)                                                    |                              |
| 25  | Wanich et al. (1992)    | USA       | Examination of targeted multicomponent interventions (strategies to educate nurses, mobilize patients, monitor medication, environmental/ sensory modifications, improve clinical/functional outcomes) | Pre- and post-test design                               | 3 medical wards                                       | Population: age over 70 years and older; pre-phase: n=100; post-phase: n=129                                                                                                                                                                      | 06/1986-03/1987; 10 months                        | Exclusion: patients who were transferred from another unit or admitted for a short stay, terminal care                                                                                    |                                                        |                              |

Legend of above table:

(1) The exact designations of the settings and patient-samples were adopted from the original data of the studies. (The "geriatric setting" include the following terms (synonymous used): acute care for elders, acute care geriatric, acute care of elder(s) units, acute geriatric ward, care wards – specialized for elderly, elderly care, geriatric ward, ortho-geriatric rehabilitation (the latter unit does not designate a classical rehabilitation facility (exclusion criterion). This term refers to geriatric early rehabilitation in the acute hospital).

(2) PwD: People with Dementia

(3) MCI: Mild Cognitive Impairment

(4) RCT: Randomized Controlled Trial

(5) IG: Intervention Group

(6) CG: Control Group

X: People with dementia or cognitive impairment were exclusively included; studies performed in the geriatric setting.

(X): Studies also included participants with pre-existing dementia or cognitive impairment in their study population; studies were partly conducted in the acute geriatric setting; studies were performed in non-geriatric units/regular wards with a geriatric care concept.
