# Supplementary material for: Multicomponent, nonpharmacological delirium interventions for older inpatients
Source: Springer Nature journal article supplement (doi:10.1007/s00391-019-01627-y), 2019-10-18
Supplement: MOESM4 [file 17290766]

Claudia Eckstein<sup>1</sup>, Heinrich Burkhardt<sup>2</sup>

<sup>1</sup> Network Ageing Research, University of Heidelberg, Germany.

<sup>2</sup> Department of Geriatric Medicine, University Medicine Mannheim, Germany.

### Identified multicomponent, non-pharmacological interventions and patient outcomes

| No. | Study                           | Type of program<br>P = Prevention<br>M = Management | Core components of the delirium intervention programs |                                                 |                      |                    |             |                       |                     |               |                              |           |              |                   |                     |      |                  | Additional interventions | Main patient outcomes |            |                 |                                                                                               |                                                                                                                                                                                                                                                                                                                                                                                                                                                                                                                                                                                                                                                                                                                                                                                                                                                                                                                             |
|-----|---------------------------------|-----------------------------------------------------|-------------------------------------------------------|-------------------------------------------------|----------------------|--------------------|-------------|-----------------------|---------------------|---------------|------------------------------|-----------|--------------|-------------------|---------------------|------|------------------|--------------------------|-----------------------|------------|-----------------|-----------------------------------------------------------------------------------------------|-----------------------------------------------------------------------------------------------------------------------------------------------------------------------------------------------------------------------------------------------------------------------------------------------------------------------------------------------------------------------------------------------------------------------------------------------------------------------------------------------------------------------------------------------------------------------------------------------------------------------------------------------------------------------------------------------------------------------------------------------------------------------------------------------------------------------------------------------------------------------------------------------------------------------------|
|     |                                 |                                                     | Detection                                             | Mode of health care supply                      | Physical environment | Social environment | Orientation | Cognitive stimulation | Sensory impairments | Fluid balance | Nutrition/feeding/metabolism | Infection | Mobilization | Medication review | (Emergency) Surgery | Pain | Day-night rhythm |                          |                       | Monitoring | Staff-education | Sufficient oxygen supply                                                                      |                                                                                                                                                                                                                                                                                                                                                                                                                                                                                                                                                                                                                                                                                                                                                                                                                                                                                                                             |
| 1   | Allen et al. (2011)             | P & M                                               | Six-Item Screener, NU-DESC                            | Multidisciplinary/interprofessional             |                      |                    |             |                       | X                   | X             | X                            |           |              |                   | X                   | X    |                  |                          | X                     | X          | X               | Computerized treatment order set: with standardized diagnostic, procedures                    | <ul style="list-style-type: none"> <li>Incidence of delirium: IG<sup>(1)</sup>: 7.2% vs. CG<sup>(2)</sup>: 8.8% (1.6% difference; 95% CI=-5.9% to 9.1%)</li> <li>Length of stay: IG<sup>(1)</sup>: 4.0 vs. CG<sup>(2)</sup>: 7.6 days (3.6-day difference; 95% CI= 0.66 to 6.49)</li> <li>Post-implementation outcomes: fewer deaths: 23% vs. 9.5%; transfers to ICU: 18% vs. 0%; fewer 30-day readmissions; 31% to 5%; higher percentage of post-implementation patients had antipsychotic medication administered during stay</li> </ul>                                                                                                                                                                                                                                                                                                                                                                                  |
| 2   | Andro et al. (2012)             | P                                                   | No routine screening; study-phase: CAM                | Multidisciplinary/interprofessional             | X                    | X                  | X           |                       | X                   | X             | X                            |           |              | X                 | X                   |      |                  |                          |                       |            |                 |                                                                                               | <ul style="list-style-type: none"> <li>Incidence of delirium: IG<sup>(1)</sup>: 5.26% vs. CG<sup>(2)</sup>: 15.45% (RR 0.34 CI 95% 0.15-0.78)</li> <li>MMSE: Pre-phase: mean MMSE 14.3 ± 7.8; post-phase: mean MMSE 13.9 ± 6.9</li> </ul>                                                                                                                                                                                                                                                                                                                                                                                                                                                                                                                                                                                                                                                                                   |
| 3   | Avendaño Céspedes et al. (2016) | P & M                                               | CAM                                                   | Nurse-led intervention                          | X                    | X                  | X           |                       | X                   | X             | X                            | X         | X            | X                 | X                   | X    | X                | X                        | X                     | X          | X               | Caregiver booklet                                                                             | <ul style="list-style-type: none"> <li>Prevalence of delirium: IG<sup>(1)</sup>: 33.3% vs. CG<sup>(2)</sup>: 48.3% (RR 0.54; 95% CI 0.17-1.72)</li> <li>Incidence of delirium: IG<sup>(1)</sup>: 14.3% vs. CG<sup>(2)</sup>: 41.4% (RR 0.24; 95% CI 0.06-0.99; p=.039)</li> <li>Duration of delirium: IG<sup>(1)</sup>: 1.7 (range 1-6) vs. CG<sup>(2)</sup>: 3.4 days (range 1-13) (p=.063)</li> <li>Severity of delirium: IG<sup>(1)</sup>: 35.0 vs. CG<sup>(2)</sup>: 65.0 (mean difference 30.0, 95% CI 1.5-58.5, p=.040), but mean severity per day was higher in the IG<sup>(1)</sup> (21.1 vs. 18.6)</li> <li>Mortality: delirious patients compared to patients without delirium at admission: 33.3% vs. 14.6%, but without differences in: IG<sup>(1)</sup> and CG<sup>(2)</sup></li> <li>Length of stay: patients with delirium compared to those without delirium: 7.7 (SD 4.1) vs. 7.1 (SD 4.2) days</li> </ul> |
| 4   | Benedict et al. (2009)          | P                                                   | NEECHAM (modified)                                    | Multidisciplinary/interprofessional             | X                    | X                  | X           |                       | X                   | X             | X                            |           |              | X                 | X                   |      |                  | X                        | X                     | X          |                 | Caregiver booklet, geriatric screening: GDS, alcohol-anamnesis                                | <ul style="list-style-type: none"> <li>Incidence of delirium: no effect</li> <li>Mean of modified NEECHAM on day 3 for the IG<sup>(1)</sup> was 3.76 vs. CG<sup>(2)</sup>: 3.24, p=.368;</li> <li>Medication: anticholinergic during hospital stay: IG<sup>(1)</sup>: 14% vs. CG<sup>(2)</sup>: 9%</li> <li>Length of stay: IG<sup>(1)</sup>: 6.0 vs. CG<sup>(2)</sup>: 5.8</li> <li>Functional deficits: IG<sup>(1)</sup>: 77% vs. CG<sup>(2)</sup>: 61%</li> </ul>                                                                                                                                                                                                                                                                                                                                                                                                                                                        |
| 5   | Bo et al. (2009)                | P                                                   | No routine screening; study-phase: CAM/DRS            | Multidisciplinary/interprofessional             | X                    |                    | X           |                       |                     | X             | X                            |           |              | X                 | X                   |      |                  | X                        | X                     |            |                 |                                                                                               | <ul style="list-style-type: none"> <li>Incidence of delirium: IG<sup>(1)</sup>: 6.6% vs. CG<sup>(2)</sup>: 15.2% (adjusted: RR: 0.90, 95% CI 0.024-0.331, p&lt;.001 (setting was independently associated with lower incidence, p&lt;.001)</li> <li>Length of stay: all delirious patients stayed longer (12.3 -f 3.4 vs. 6.3 + 2.0 d, p&lt;.0001).</li> </ul>                                                                                                                                                                                                                                                                                                                                                                                                                                                                                                                                                              |
| 6   | Foster et al. (2010)            | P & M                                               | Abbreviated mental test; study-phase: CAM             | Multidisciplinary/interprofessional             | X                    | X                  | X           | X                     |                     |               |                              |           |              |                   | X                   |      |                  |                          |                       | X          |                 | Clinical pathway/standardized nursing care, "information and rummage box", carer leaflet      | <ul style="list-style-type: none"> <li>Prevalence of delirium: similar in both groups, 34 randomly selected sets of patients' notes were audited over a 4-week period. Nurses noted confusion in 14, physicians in 10 cases. Only 4 patients had an Abbreviated Mental Test.</li> <li>All patients had between 1-6 prevention strategies implemented according to the care plan</li> </ul>                                                                                                                                                                                                                                                                                                                                                                                                                                                                                                                                  |
| 7   | Godfrey et al. (2013)           | P                                                   |                                                       | Multidisciplinary/interprofessional             | X                    | X                  | X           | X                     | X                   | X             | X                            | X         | X            | X                 | X                   | X    |                  |                          | X                     | X          | X               |                                                                                               | Not focused on patient-outcomes                                                                                                                                                                                                                                                                                                                                                                                                                                                                                                                                                                                                                                                                                                                                                                                                                                                                                             |
| 8   | Hasemann et al. (2016)          | P & M                                               | DOS; clock test, MSQ; study-phase: CAM, DRS-R-98      | (Nurse-led) Multidisciplinary/interprofessional | X                    | X                  | X           | X                     | X                   | X             | X                            | X         | X            | X                 | X                   | X    | X                | X                        | X                     | X          | X               | Advanced screening: digit span/ clock-/comprehension test, MMSE, individual intervention plan | <ul style="list-style-type: none"> <li>Incidence of delirium: 3.6% lower in IG<sup>(1)</sup>, but not significantly (p=.896)</li> <li>Severity of delirium: no significant effect IG<sup>(1)</sup>: vs. CG<sup>(2)</sup> (F(1,102) = 0.093; p=.761)</li> <li>Duration of delirium: IG<sup>(1)</sup>: 4.1 days (SD 3.4) vs. CG<sup>(2)</sup>: 3.0 days (SD 3.1)</li> <li>Adherence vs. non-adherence: (F(1,48) = 4.079, p=.050 (overall non-adherence rate: 34.1%)</li> <li>Shift from neuroleptic to atypical neuroleptic less Lorazepam use (U=361.5; p=.027)</li> </ul>                                                                                                                                                                                                                                                                                                                                                   |
| 9   | Holroyd-Leduc et al. (2010)     | P                                                   | CAM                                                   | Multidisciplinary/interprofessional             |                      |                    |             |                       | X                   | X             | X                            |           |              | X                 | X                   | X    |                  |                          | X                     | X          |                 | Study                                                                                         | <ul style="list-style-type: none"> <li>Incidence of delirium: no effect on the over-all delirium rate (33% pre vs. 31% post, p=.84), differences in enrolled hospitals</li> <li>Mortality: no pre-post differences (one death among those enrolled)</li> <li>Length of stay: no significant differences in 12 days post vs. 14 days pre; p=.74</li> <li>Falls: 6% post vs. 10% pre; p=.43</li> <li>Discharges to long-term care: 6% post vs. 13% pre; p=.20</li> </ul>                                                                                                                                                                                                                                                                                                                                                                                                                                                      |
| 10  | Holt et al. (2013)              | P                                                   | No routine screening; study-phase: CAM/DRS-R-98       | Multidisciplinary/interprofessional             |                      |                    | X           |                       | X                   | X             | X                            |           |              | X                 |                     |      |                  | X                        |                       | X          |                 |                                                                                               | <ul style="list-style-type: none"> <li>Delirium incidence during first 7 days: IG<sup>(1)</sup>: 4.6% vs. CG<sup>(2)</sup>: 13.3%, p=.006</li> <li>Duration of delirium: IG<sup>(1)</sup>: 0.06 days, ± 0.287 vs. CG<sup>(2)</sup>: 0.29 days; ± 0.931, p=.002</li> <li>Severity of delirium: IG<sup>(1)</sup>: 9.17, ± 7.94 vs. CG<sup>(2)</sup>: 16.86, ± 4.92; p=.005</li> <li>Mortality/length of hospital stay/functional status at discharge/admission to long-term care: no significant group differences</li> <li>Readmission: CG<sup>(2)</sup> were significantly higher</li> </ul>                                                                                                                                                                                                                                                                                                                                |
