# Supplementary material for: Multicomponent, nonpharmacological delirium interventions for older inpatients
Source: Springer Nature journal article supplement (doi:10.1007/s00391-019-01627-y), 2019-10-18
Supplement: MOESM5 [file 17290766]

Claudia Eckstein<sup>1</sup>, Heinrich Burkhardt<sup>2</sup><sup>1</sup> Network Ageing Research, University of Heidelberg, Germany.<sup>2</sup> Department of Geriatric Medicine, University Medicine Mannheim, Germany.

## Recommendations (overview) of relevant medical delirium guidelines

| Recommendations<br>to prevent / to manage delirium | Number of included guidelines (GL)* |   |   |   |   |   |   |   |   |    |
|----------------------------------------------------|-------------------------------------|---|---|---|---|---|---|---|---|----|
|                                                    | 1                                   | 2 | 3 | 4 | 5 | 6 | 7 | 8 | 9 | 10 |
| <b>1 Detection</b>                                 | X                                   | X | X | X | X | X | X | X | X | X  |
| <b>2 Mode of health care supply</b>                | X <sup>1</sup>                      | X | X |   | X | X | X | X | X |    |
| <b>3 Material environment</b>                      |                                     | X | X | X | X | X | X | X |   | X  |
| <b>4 Social environment</b>                        |                                     | X | X | X | X | X | X | X |   |    |
| <b>5 Orientation</b>                               | X                                   | X | X | X | X | X | X | X | X | X  |
| <b>6 Cognitive stimulation</b>                     |                                     |   | X |   | X | X | X | X |   |    |
| <b>7 Sensory impairments</b>                       | X                                   | X | X | X | X | X | X | X | X | X  |
| <b>8 Fluid balance</b>                             | X                                   | X | X | X | X | X | X | X | X | X  |
| <b>9 Nutrition/eating/metabolism</b>               |                                     | X | X | X | X | X | X | X | X |    |
| <b>10 Infection</b>                                | X                                   | X | X | X | X | X | X | X | X | X  |
| <b>11 Mobilization</b>                             | X                                   | X | X | X | X | X | X | X |   |    |
| <b>12 Medication review</b>                        | X                                   | X | X | X | X | X | X | X | X | X  |
| <b>13 (Emergency) Surgery</b>                      | X                                   | X | X | X | X |   |   | X | X | X  |
| <b>14 Pain</b>                                     |                                     | X | X | X | X | X | X | X | X | X  |
| <b>15 Day-night rhythm</b>                         | X                                   | X | X | X |   | X | X | X |   |    |
| <b>16 Monitoring</b>                               | X                                   | X | X | X | X | X | X | X | X | X  |
| <b>17 Education</b>                                |                                     | X | X | X |   | X | X | X | X | X  |
| <b>18 Sufficient oxygen supply</b>                 |                                     | X | X | X | X | X | X | X | X | X  |

Legend of this and all following tables: X = Intervention component integrated or as a risk factor considered

\*Included medical delirium guidelines (GL) in this and all following tables:

- 1 International: Leentjens et al. (2012)
- 2 Australia: Health Care of Older Australian Standing Committee (HCOASC), and the Australian Department of Health and Ageing (2008)
- 3 Canada: Canadian Coalition for Seniors' Mental Health (CCSMH) (2006)
- 4 Great Britain: British Geriatrics Society (BGS), Royal College of Physicians (RCP) (2006)
- 5 Great Britain: Fleet, J.; Ernst, T. Guy's and St. Thomas' - NHS Foundation Trust (2013)
- 6 Great Britain: NICE (National Institute for Health and Care Excellence, GB) (2010)
- 7 Netherlands: Leentjens et al. (2014)
- 8 Switzerland: Savaskan et al. (2016)
- 9 USA: The American Geriatrics Society Expert Panel on Postoperative Delirium in Older Adults (2015)
- 10 USA: American Psychiatric Association (APA) (2010)

<sup>1</sup> Available evidence does not allow recommendations of specific models of organization (GL: 1, Leentjens et al. 2012)

Claudia Eckstein<sup>1</sup>, Heinrich Burkhardt<sup>2</sup><sup>1</sup> Network Ageing Research, University of Heidelberg, Germany.<sup>2</sup> Department of Geriatric Medicine, University Medicine Mannheim, Germany.

## Recommendations (details) of relevant medical delirium guidelines

| Recommendations<br>to prevent/to manage delirium                                                                       | Number of included guideline (GL)* |   |   |   |   |   |   |   |   |    |
|------------------------------------------------------------------------------------------------------------------------|------------------------------------|---|---|---|---|---|---|---|---|----|
|                                                                                                                        | 1                                  | 2 | 3 | 4 | 5 | 6 | 7 | 8 | 9 | 10 |
| <b>1 Detection</b>                                                                                                     |                                    |   |   |   |   |   |   |   |   |    |
| Defined as risk groups<br>(old age, people with dementia/MCI)                                                          | X                                  | X | X | X | X | X | X | X | X | X  |
| Screening/early detection                                                                                              | X                                  | X | X | X | X | X | X | X | X | X  |
| Pay attention to changes in behavior                                                                                   |                                    |   |   |   |   |   |   | X |   |    |
| Targeting individual risk factors                                                                                      |                                    |   | X |   |   |   |   |   |   |    |
| Medical report                                                                                                         |                                    |   |   |   |   |   |   | X |   |    |
| History from relatives/carers/examination/<br>investigation                                                            |                                    |   |   | X |   |   |   |   |   |    |
| Professionals are familiar to persons at risk                                                                          |                                    |   |   |   | X | X | X |   |   |    |
| Follow up and assess for possible dementia                                                                             |                                    |   |   |   |   | X | X |   | X |    |
| <b>2 Mode of health care supply</b>                                                                                    |                                    |   |   |   |   |   |   |   |   |    |
| No changes of nurses, wards, bays                                                                                      |                                    |   |   |   | X | X | X |   |   |    |
| Carry out multicomponent interventions...                                                                              |                                    | X | X |   |   | X | X | X | X |    |
| ...that are tailored, based on assessments                                                                             |                                    |   |   |   |   | X | X |   |   |    |
| ...that are on a multidisciplinary/<br>interprofessional basis by (competent and<br>trained health care professionals) |                                    |   | X |   |   | X | X | X | X |    |
| Don't do unnecessary tests                                                                                             |                                    |   |   |   | X |   |   |   |   |    |
| Prevent complications                                                                                                  |                                    | X |   |   |   |   |   |   |   |    |
| Available evidence does not allow for recommen-<br>dations of specific model of organization                           | X                                  |   |   |   |   |   |   |   |   |    |
| <b>3 Material environment</b>                                                                                          |                                    |   |   |   |   |   |   |   |   |    |
| Personal objectives/family pictures                                                                                    |                                    | X |   |   | X |   |   |   |   |    |
| Avoid bedrails                                                                                                         |                                    |   |   |   |   | X | X |   |   |    |
| Avoid physical restraints                                                                                              |                                    | X |   | X | X |   |   | X |   |    |
| Avoid sensory deprivation                                                                                              |                                    |   | X |   |   |   |   |   |   | X  |
| Quiet (especially at night)/safe environment                                                                           |                                    | X |   |   | X | X | X | X |   | X  |
| Prefer single rooms                                                                                                    |                                    | X |   |   |   |   |   |   |   |    |
| Avoid side rooms                                                                                                       |                                    |   |   |   | X |   |   |   |   |    |
| Put delirious patients not in the same room                                                                            |                                    |   | X |   |   |   |   |   |   |    |
| Optimal level of environmental stimulation                                                                             |                                    |   |   |   |   |   |   |   |   | X  |
| Environmental risk factors should be modified/<br>incorporated into care plans                                         |                                    | X | X |   |   |   |   |   |   |    |
| Reduce/eliminate environmental factors                                                                                 |                                    |   | X |   |   |   |   |   |   | X  |
| Appropriate Lighting                                                                                                   |                                    | X | X |   | X | X | X | X |   |    |
| ...and avoid bright lights at night                                                                                    |                                    |   |   |   | X |   |   | X |   |    |
| <b>4 Social environment</b>                                                                                            |                                    |   |   |   |   |   |   |   |   |    |
| Empathy/notice (acknowledge feelings,...)                                                                              |                                    |   |   |   | X |   |   | X |   |    |
| Attitude of warmth, calmness and kind<br>firmness, explain providing care                                              |                                    |   | X |   |   |   |   |   |   |    |
| Customized communication                                                                                               |                                    |   | X | X | X | X | X | X |   |    |
| Discuss topics that are familiar or of interest                                                                        |                                    |   | X |   |   |   |   |   |   |    |
| Encourage independence (in basic ADLs)                                                                                 |                                    | X |   |   |   |   |   |   |   |    |
| Avoid gestures or touching                                                                                             |                                    |   | X |   |   |   |   |   |   |    |
| Family/carer involvement                                                                                               |                                    | X |   |   | X | X | X | X |   |    |
| Alliance with patients/carer/friends                                                                                   |                                    |   | X |   |   |   |   |   |   |    |
| Allow watching movies, listening to music –<br>interrupt if patient is disorientated or disturbed                      |                                    |   | X |   |   |   |   |   |   |    |

Claudia Eckstein<sup>1</sup>, Heinrich Burkhardt<sup>2</sup>

<sup>1</sup> Network Ageing Research, University of Heidelberg, Germany.

<sup>2</sup> Department of Geriatric Medicine, University Medicine Mannheim, Germany.

| Recommendations<br>to prevent / to manage delirium                   | Number of included guideline (GL)* |   |   |   |   |   |   |   |   |    |   |
|----------------------------------------------------------------------|------------------------------------|---|---|---|---|---|---|---|---|----|---|
|                                                                      | 1                                  | 2 | 3 | 4 | 5 | 6 | 7 | 8 | 9 | 10 |   |
| <b>5 Orientation</b>                                                 |                                    |   |   |   |   |   |   |   |   |    |   |
| (Re-)Orientation (information staff/role/who and where they are,...) | X                                  | X | X | X | X | X | X | X | X | X  | X |
| Orientation protocol                                                 |                                    |   | X |   |   |   |   |   |   |    |   |
| Help with repeated questions                                         |                                    |   |   |   |   |   |   | X |   |    |   |
| Clock, calendar                                                      |                                    | X |   |   | X | X | X | X |   |    | X |
| Clear signage                                                        |                                    |   |   |   |   | X | X | X |   |    | X |
| Engagements in activities                                            |                                    |   |   | X |   |   |   |   |   |    |   |
| <b>6 Cognitive stimulation</b>                                       |                                    |   |   |   |   |   |   |   |   |    |   |
| General recommendations – not specified                              |                                    |   | X |   | X | X | X | X | X |    |   |
| Avoid over-stimulation                                               |                                    |   |   |   |   |   |   | X |   |    |   |
| <b>7 Sensory impairments</b>                                         |                                    |   |   |   |   |   |   |   |   |    |   |
| Ensure/assist wearing vision/hearing aids                            | X                                  | X | X | X | X | X | X | X | X | X  | X |
| Evaluating reversible causes/devices                                 |                                    |   | X |   |   | X | X |   |   |    |   |
| <b>8 Fluid balance</b>                                               |                                    |   |   |   |   |   |   |   |   |    |   |
| Reducing the risk/treatment of dehydration                           | X                                  | X | X | X | X | X | X | X | X | X  | X |
| Ensure/encourage/assist oral drinking                                |                                    | X | X |   | X | X | X | X |   |    |   |
| s.c./i.v. fluid if necessary                                         |                                    |   |   |   |   | X | X | X |   |    |   |
| Early remove of i.v. infusion                                        |                                    |   |   |   |   |   |   | X |   |    |   |
| <b>9 Nutrition/Eating/Metabolism</b>                                 |                                    |   |   |   |   |   |   |   |   |    |   |
| Balanced diet/avoid/treat malnutrition                               |                                    | X | X | X | X | X | X | X | X | X  |   |
| Documentation of food intake                                         |                                    |   |   |   |   |   |   | X |   |    |   |
| Involving diabetics if necessary                                     |                                    |   |   |   | X |   |   | X |   |    |   |
| Nutrition support                                                    |                                    |   |   |   |   | X | X |   |   |    |   |
| Encourage patients to move to dining room                            |                                    |   |   |   |   |   |   | X |   |    |   |
| Invite relatives to share mealtime                                   |                                    |   |   |   |   |   |   | X |   |    |   |
| Consider nutrition by providing dentures                             |                                    |   |   |   | X | X | X | X |   |    |   |
| Avoiding soor/aspiration pneumonia                                   |                                    |   |   |   |   |   |   | X |   |    |   |
| Balancing Electrolyte                                                |                                    | X | X | X | X | X | X | X |   |    | X |
| Regulation of bowel function/prevention of constipation              |                                    | X |   |   | X | X | X | X | X |    |   |
| Regulation of bladder function                                       |                                    | X | X | X |   | X | X | X |   |    |   |
| <b>10 Infection</b>                                                  |                                    |   |   |   |   |   |   |   |   |    |   |
| Looking for and treating infection                                   | X                                  | X | X | X | X | X | X | X | X | X  | X |
| Avoiding iatrogenic events                                           |                                    |   |   | X | X |   |   | X |   |    |   |
| Avoiding (indwelling) catheter                                       |                                    | X | X | X | X | X | X | X |   |    |   |
| <b>11 Mobilization</b>                                               |                                    |   |   |   |   |   |   |   |   |    |   |
| Encourage/assist regular mobilization                                |                                    | X |   | X | X |   |   | X |   |    |   |
| Range of motion exercise                                             |                                    |   |   |   |   | X | X |   |   |    |   |
| Exercise in bed                                                      |                                    |   |   |   |   |   |   | X |   |    |   |
| Supported by physio-/occupational therapist                          |                                    |   |   |   |   |   |   | X |   |    |   |
| Fall prevention/improving sense of balance                           |                                    |   |   |   | X |   |   | X |   |    |   |
| Early mobilization (general)...                                      |                                    |   | X | X | X |   |   |   |   |    |   |
| ...soon after surgery                                                |                                    |   |   |   |   | X | X | X |   |    |   |
| Provide appropriate walking aids                                     |                                    |   |   |   |   | X | X | X |   |    |   |
| Reduce the risk of immobility                                        | X                                  | X |   | X |   |   |   |   |   |    |   |

Claudia Eckstein<sup>1</sup>, Heinrich Burkhardt<sup>2</sup>

<sup>1</sup> Network Ageing Research, University of Heidelberg, Germany.

<sup>2</sup> Department of Geriatric Medicine, University Medicine Mannheim, Germany.

| Recommendations<br>to prevent / to manage delirium                                                        | Number of included guideline (GL)* |   |   |   |   |   |   |   |   |    |
|-----------------------------------------------------------------------------------------------------------|------------------------------------|---|---|---|---|---|---|---|---|----|
|                                                                                                           | 1                                  | 2 | 3 | 4 | 5 | 6 | 7 | 8 | 9 | 10 |
| <b>12 Medication review</b>                                                                               |                                    |   |   |   |   |   |   |   |   |    |
| Reduce/avoid polypharmacy                                                                                 |                                    |   | X | X |   | X | X |   |   |    |
| Medication control                                                                                        |                                    | X | X |   |   | X | X | X | X | X  |
| ...administer only essential medications                                                                  |                                    |   |   |   |   |   |   | X |   |    |
| Reduce/avoid /be careful with psychoactive drugs                                                          | X                                  | X | X | X |   | X | X | X |   |    |
| Reduce/avoid drugs that induce delirium postoperatively                                                   |                                    |   |   |   |   |   |   |   | X |    |
| Monitor drug intake...                                                                                    |                                    |   |   |   |   |   |   | X |   |    |
| ...and adverse drug disease                                                                               |                                    |   | X |   |   |   |   |   |   |    |
| <b>13 (Emergency) Surgery</b>                                                                             |                                    |   |   |   |   |   |   |   |   |    |
| Prevent/detect/treat post-op complications                                                                |                                    |   | X | X |   | X | X | X | X |    |
| Proactive consultation (geriatrician/psychiatrist/...) to persons undergoing surgery                      |                                    |   | X |   |   |   |   |   |   |    |
| ...preoperatively or within 24h after surgery, and daily after surgery                                    |                                    | X |   |   |   |   |   |   |   |    |
| <b>14 Pain</b>                                                                                            |                                    |   |   |   |   |   |   |   |   |    |
| Assessing/treating for pain (non-verbal signs, people with dementia and communication difficulties)       |                                    | X | X | X | X | X | X | X | X | X  |
| Reviewing appropriate pain management                                                                     |                                    |   | X |   |   | X | X | X |   |    |
| Non-pharmacological approaches                                                                            |                                    |   | X |   |   |   |   |   |   |    |
| <b>15 Day-night rhythm</b>                                                                                |                                    |   |   |   |   |   |   |   |   |    |
| Promoting relaxing/sleep (patterns) and encouraging wakefulness                                           | X                                  | X | X |   | X | X | X | X | X |    |
| Avoiding nursing or medical procedures during night                                                       |                                    |   |   |   |   | X | X | X |   |    |
| Avoid routine use of sedatives for sleep problems – use non-pharmacologic sleep-protocol                  |                                    |   | X |   |   |   |   |   |   |    |
| <b>16 Monitoring</b>                                                                                      |                                    |   |   |   |   |   |   |   |   |    |
| (Daily), close observation of all people in hospital for recent changes or fluctuations in usual behavior | X                                  | X | X | X | X | X | X | X | X | X  |
| Documentation                                                                                             |                                    | X | X | X | X | X | X | X | X | X  |
| Assessment (Diagnose)                                                                                     | X                                  | X | X | X | X | X | X | X | X | X  |
| <b>17 Education</b>                                                                                       |                                    |   |   |   |   |   |   |   |   |    |
| Educational interventions directed to staff                                                               |                                    | X | X | X | X | X | X | X | X |    |
| Formal programs with ongoing formal/informal refresher sessions                                           |                                    |   |   |   |   |   |   |   | X |    |
| Training to recognize hypoactive delirium                                                                 |                                    |   |   |   |   |   |   |   | X |    |
| Educate patients and their carers/family                                                                  |                                    | X |   |   |   |   |   |   |   | X  |
| <b>18 Sufficient oxygen supply</b>                                                                        |                                    |   |   |   |   |   |   |   |   |    |
| Assessing hypoxia and optimizing saturation                                                               |                                    | X | X | X | X | X | X | X | X | X  |

Claudia Eckstein<sup>1</sup>, Heinrich Burkhardt<sup>2</sup>

<sup>1</sup> Network Ageing Research, University of Heidelberg, Germany.

<sup>2</sup> Department of Geriatric Medicine, University Medicine Mannheim, Germany.

| Additional recommendations for treatment of delirium                                                                                                                                                                                                                                                | Number of included guideline (GL)* |   |   |   |   |   |   |   |   |    |
|-----------------------------------------------------------------------------------------------------------------------------------------------------------------------------------------------------------------------------------------------------------------------------------------------------|------------------------------------|---|---|---|---|---|---|---|---|----|
|                                                                                                                                                                                                                                                                                                     | 1                                  | 2 | 3 | 4 | 5 | 6 | 7 | 8 | 9 | 10 |
| <b>Assessing the psychiatric status and monitoring/psychiatric management</b>                                                                                                                                                                                                                       |                                    |   |   |   |   |   |   |   |   | X  |
| <b>Increase supervision during delirium (in the following sequence: RN's, family members, nurse sitter, personal care attendant or patient companion)</b>                                                                                                                                           |                                    |   | X |   |   |   |   |   |   |    |
| <b>Cognitive-emotional supportive measures</b>                                                                                                                                                                                                                                                      |                                    |   |   |   |   |   |   |   |   | X  |
| <b>Intraoperative measurement</b>                                                                                                                                                                                                                                                                   |                                    |   |   |   |   |   |   |   | X |    |
| <b>Triggers and causes</b>                                                                                                                                                                                                                                                                          |                                    |   |   |   |   |   |   |   |   |    |
| Investigate and address causes of delirium                                                                                                                                                                                                                                                          | X                                  | X | X | X | X | X | X | X | X | X  |
| Treatment of underlying/contributing causes...                                                                                                                                                                                                                                                      | X                                  |   | X | X | X | X | X | X |   | X  |
| ... or combination of causes                                                                                                                                                                                                                                                                        |                                    |   |   |   |   | X | X |   |   |    |
| Re-evaluate underlying causes                                                                                                                                                                                                                                                                       |                                    |   |   |   |   | X | X |   |   |    |
| <b>Signs and symptoms</b>                                                                                                                                                                                                                                                                           |                                    |   |   |   |   |   |   |   |   |    |
| Treatment of hypoactive delirium                                                                                                                                                                                                                                                                    |                                    |   |   |   |   |   |   | X |   |    |
| Coordinating the care with other clinicians, advice to nurses/general medical physicians                                                                                                                                                                                                            |                                    |   |   |   |   |   |   |   |   | X  |
| Initiating immediate (somatic) interventions for urgent general medical conditions                                                                                                                                                                                                                  |                                    |   |   |   |   |   |   |   |   | X  |
| Psychiatric review, if hallucinations present                                                                                                                                                                                                                                                       |                                    |   |   |   | X |   |   |   |   |    |
| Symptomatic treatment/management of symptoms                                                                                                                                                                                                                                                        | X                                  | X |   |   |   |   |   |   |   |    |
| <b>Advice and information</b>                                                                                                                                                                                                                                                                       |                                    |   |   |   |   |   |   |   |   |    |
| Explanation of the cause/the diagnoses of confusion to relatives...                                                                                                                                                                                                                                 |                                    |   |   | X | X | X | X | X |   |    |
| ...and patients                                                                                                                                                                                                                                                                                     |                                    |   |   |   |   | X | X | X |   | X  |
| Reassurance/education regarding risk factors for future episodes                                                                                                                                                                                                                                    |                                    |   |   |   |   |   |   |   |   | X  |
| Integration of caregivers/ family into therapy                                                                                                                                                                                                                                                      |                                    |   |   |   |   |   |   | X |   |    |
| Transfer to another practitioner/ service: inform about the presence of delirium and treatment                                                                                                                                                                                                      |                                    |   | X |   |   |   |   |   |   |    |
| <b>Assessing individual and family psycho-logical/social characteristics</b>                                                                                                                                                                                                                        |                                    |   |   |   |   |   |   |   |   | X  |
| <b>Establishing/ maintaining a supportive therapeutic stance with patients/family, other clinicians</b>                                                                                                                                                                                             |                                    |   |   |   |   |   |   |   |   | X  |
| <b>Behavioral management strategies/ effective communication techniques especially to agitated patients</b>                                                                                                                                                                                         | X                                  |   | X |   |   | X | X | X |   |    |
| <b>De-escalation: use of verbal and non-verbal techniques if a patient is distressed/considered a risk to themselves or others</b>                                                                                                                                                                  |                                    |   |   |   | X | X | X |   |   |    |
| <b>In case that the initial management described above has no effect, some guidelines recommend a second line management for those in distress or considered to be at risk to themselves or others. If de-escalation techniques have no effect, pharmacological interventions may be considered</b> | X                                  |   |   |   |   | X | X |   |   |    |
